# Supplementary material
Source: publisher figshare collection journal article supplement (https://acs.figshare.com/ndownloader/files/13782140)
Supplement: Supplementary file 1 [file 13782140]

## Supporting Information

### The Impact of Graphene Oxide on Algal Organic Matter of *Microcystis aeruginosa*

Huaijia Xin<sup>a</sup>, Yulin Tang<sup>a,b\*</sup>, Shulin Liu<sup>a</sup>, Xin Yang<sup>a</sup>, Shengji Xia<sup>a,b</sup>,  
Daqiang Yin<sup>c</sup>, Shuili Yu<sup>a,b</sup>

- a. State Key Laboratory of Pollution Control and Resource Reuse, College of Environmental Science & Engineering, Tongji University, No. 1239 Siping Rd, Shanghai, 200092, P.R. China
- b. Shanghai Institute of Pollution Control and Ecological Security, No. 1239 Siping Rd, Shanghai, 200092, P.R. China
- c. Key Lab Yangtze River Water Environment of Ministry of Education, No. 1239 Siping Rd, Shanghai, 200092, P.R. China

**Corresponding Author: Yulin Tang**

\*Tel.: +86 21 65982708; Fax: +86 21 65982708; Email: tangtongji@126.com

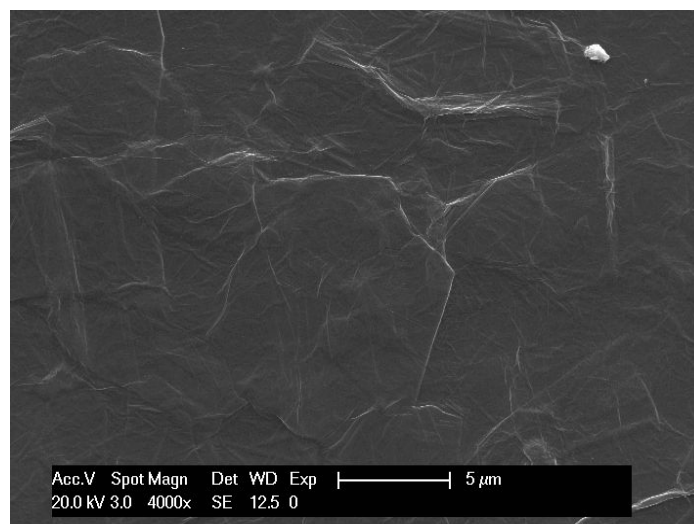

**Figure S1.** The SEM image of GO.

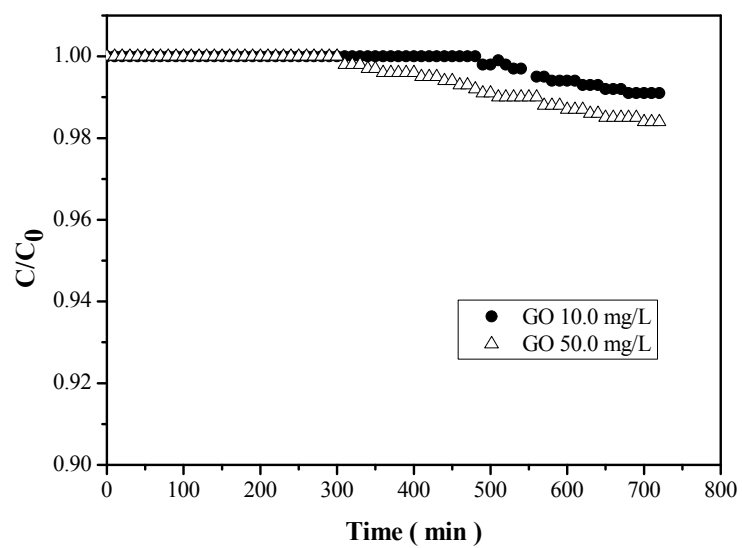

**Figure S2.** The sedimentation process of GO in the BG-11 medium.

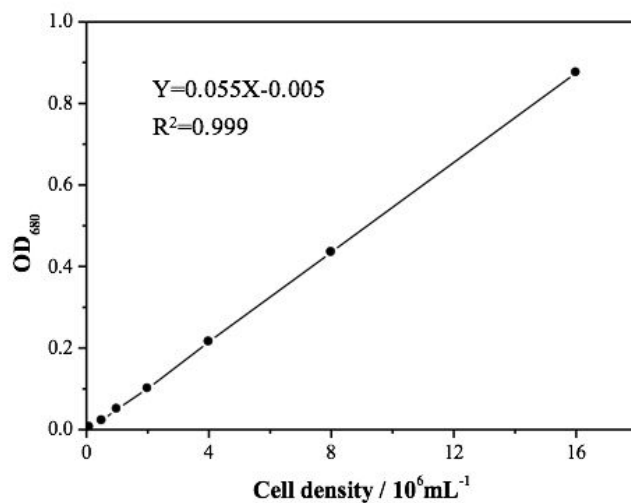

**Figure S3.** The correlation curve of the algal absorbance at 680 nm and the algal cell density.

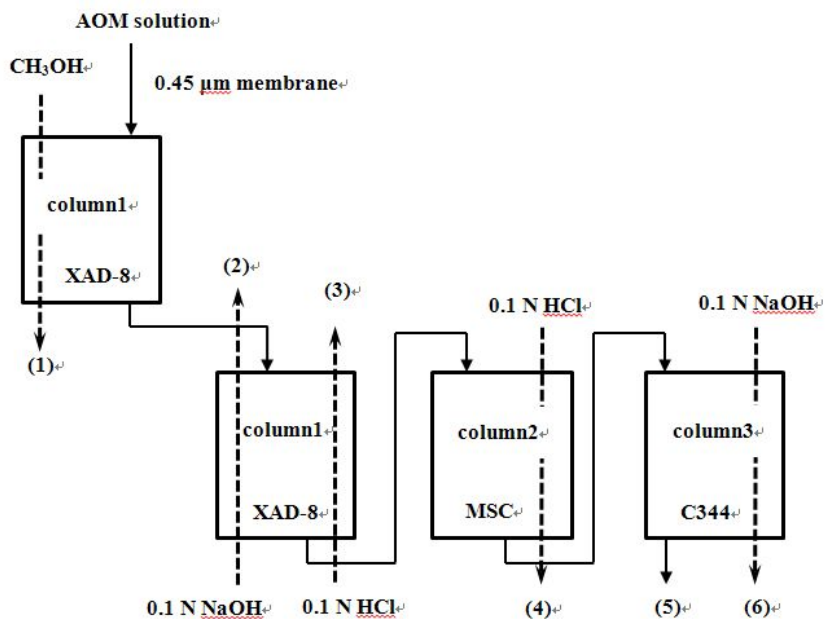

- (1) Hydrophobic neutral (HPON)   (2) Hydrophobic acids (HPOA)   (3) Hydrophobic bases (HPOB)  
 (4) Hydrophilic bases (HPIB)   (5) Hydrophilic neutral (HPIN)   (6) Hydrophilic acids (HPIA)

**Figure S4.** Analytical procedure for organic carbon fractionation preparation.
